# Supplementary material for: Enantiopure sandwich-type nonanuclear LnIII3MnIII6 clusters
Source: Royal Society of Chemistry journal article supplement (doi:10.1039/c1dt10044k), 2011-01-01
Supplement: c1dt10044k.pdf [file c1dt10044k.pdf]

## Electronic Supplementary Information

### **Enantiopure Sandwich-type Nonanuclear Ln<sup>III</sup><sub>3</sub>Mn<sup>III</sup><sub>6</sub> Clusters**

Yong Zheng, Xiang-Jian Kong, La-Sheng Long,\* Rong-Bin Huang, and Lan-Sun Zheng

*State Key Laboratory of Physical Chemistry of Solid Surfaces and Department of Chemistry, College of Chemistry and Chemical Engineering, Xiamen University, Xiamen 361005, China.*

Email: lslong@xmu.edu.cn

**Table S1.** Bond valence sum (BVS) calculations for Mn<sup>3+</sup> ions in complexes **1** and **2**.

| <b>1</b> |      | <b>2</b> |      |
|----------|------|----------|------|
| Mn1      | 3.00 | Mn1      | 3.00 |
| Mn2      | 2.93 | Mn2      | 2.94 |
| Mn3      | 2.90 | Mn3      | 2.91 |
| Mn4      | 3.08 | Mn4      | 3.07 |
| Mn5      | 3.01 | Mn5      | 3.00 |
| Mn6      | 2.97 | Mn6      | 2.98 |

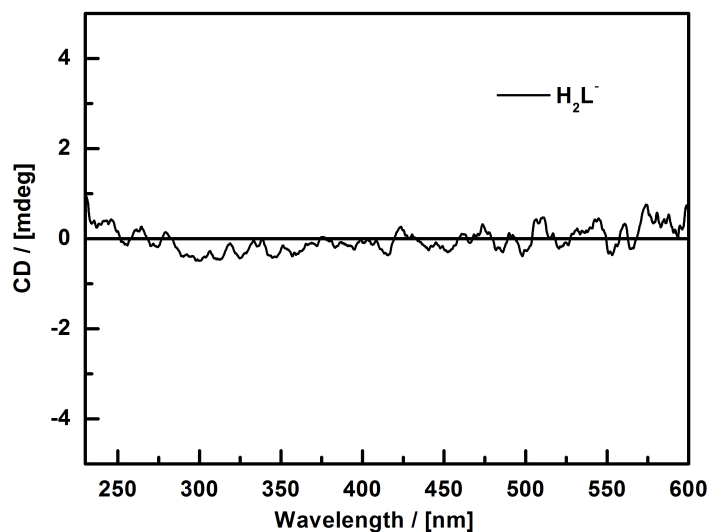

**Fig. S1** The CD spectrum of H<sub>2</sub>L<sup>-</sup> in methanol.

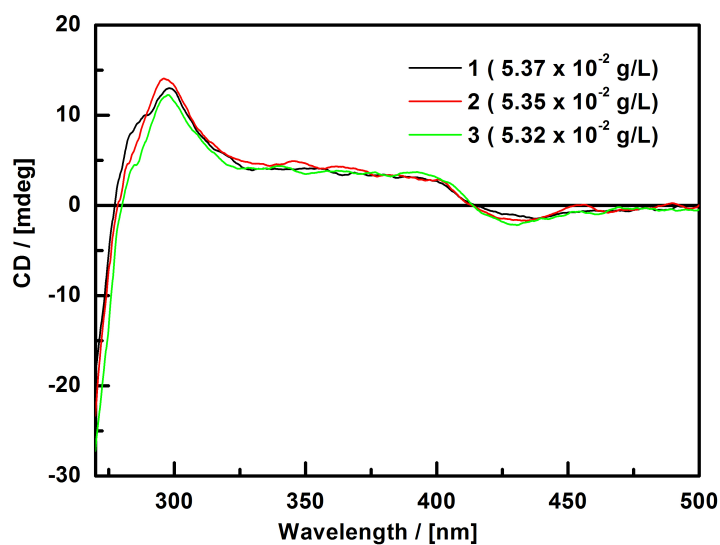

**Fig. S2** The CD spectra of bulk samples of **1**, **2** and **3** in methanol.

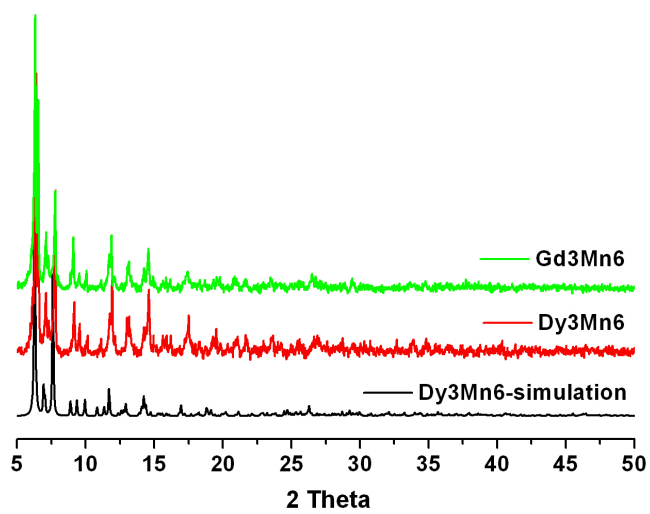

**Fig. S3** PXRD patterns of **1** and **3** as-synthesized, together with simulation of **1** according to single crystal structural determinations.
